# Supplementary material for: Behavior Change Techniques in mHealth Apps for the Mental and Physical Health of Employees: Systematic Assessment
Source: PubMed Central journal article supplement (PMC6231882; doi:10.2196/mhealth.6363), 2018-10-03
Supplement: mhealth_v6i10e167_app1.pdf [file mhealth_v6i10e167_app1.pdf]

## Multimedia Appendix 1. Definitions of Behavior Change Techniques

This is a Multimedia Appendix to a full manuscript published in the JMIR mHealth and uHealth. For full copyright and citation information see <http://mhealth.jmir.org> doi:10.2196/mhealth.6363

Below, definitions of Behavior Change Techniques, used to evaluate the apps in the current study. Definitions are based on the work of Abraham & Michie (2008) and adapted to be used for evaluation apps. Adaptions are shown in *italics*

| <b>Definitions of Behavior Change Techniques (BCTs)</b> |                                                                                                                                                                                                                                         |
|---------------------------------------------------------|-----------------------------------------------------------------------------------------------------------------------------------------------------------------------------------------------------------------------------------------|
| 1. Provide information about behavior health link       | General information about behavioral risk, for example, susceptibility to poor health outcomes or mortality risk in relation to the behavior.                                                                                           |
| 2. Provide information on consequences                  | Information about the benefits and costs of action or inaction, focusing on what will happen if the person does or does not perform the behavior.                                                                                       |
| 3. Provide information about others' approval           | Information about what others think about the person's behavior and whether others will approve or disapprove of any proposed behavior change.                                                                                          |
| 4. Prompt intention formation                           | Encouraging the person to decide to act or set a general goal, for example, to make a behavioral resolution such as "I will take more exercise next week".                                                                              |
| 5. Prompt barrier identification                        | Identify barriers to performing the behavior and plan ways of overcoming them.                                                                                                                                                          |
| 6. Provide general encouragement                        | Praising or rewarding the person for effort or performance without this being contingent on specified behaviors or standards of performance.                                                                                            |
| 7. Set graded tasks                                     | Set easy tasks, and increase difficulty until target behavior is performed.                                                                                                                                                             |
| 8. Provide instruction                                  | Telling the person how to perform a behavior and/or preparatory behaviors.                                                                                                                                                              |
| 9. Model/ demonstrate the behavior                      | An expert shows the person how to correctly perform a behavior, for example, in class or on video, <i>or by visualizations in the app.</i>                                                                                              |
| 10. Prompt specific goal setting                        | Involves detailed planning of what the person will do, including a definition of the behavior specifying frequency, intensity, or duration and specification of at least one context, that is, where, when, how, or with whom.          |
| 11. Prompt review of behavioral goals                   | Review and/or reconsideration of previously set goals or intentions                                                                                                                                                                     |
| 12. Prompt self-monitoring of behavior                  | The person is asked to keep a record of specified behavior(s) (e.g., in a diary).<br><i>An app that requires pressing a button at every intake would also count as an instance of self-report. Multiple time-points.</i>                |
| 13. Provide feedback on performance                     | Providing data about recorded behavior or evaluating performance in relation to a set standard or others' performance, i.e., the person received feedback on their behavior. <i>Includes providing an overview of recorded behavior</i> |
| 14. Provide contingent rewards                          | Praise, encouragement, or material rewards that are explicitly linked to the achievement of specified behaviors.                                                                                                                        |

|                                                 |                                                                                                                                                                                                     |
|-------------------------------------------------|-----------------------------------------------------------------------------------------------------------------------------------------------------------------------------------------------------|
| 15. Teach to use prompts/ cues                  | Teach the person to identify environmental cues that can be used to remind them to perform a behavior, including times of day or elements of contexts.                                              |
| 16. Agree behavioral contract                   | Agreement (e.g., signing) of a contract specifying behavior to be performed so that there is a written record of the person's resolution witnessed by another.                                      |
| 17. Prompt practice                             | Prompt the person to rehearse and repeat the behavior or preparatory behaviors.                                                                                                                     |
| 18. Use follow up prompts                       | Contacting the person again after the main part of the intervention is complete.                                                                                                                    |
| 19. Provide opportunities for social comparison | Facilitate observation of non-expert others' performance for example, in a group class or using video or case study <i>or via app</i> .                                                             |
| 20. Plan social support/ social change          | Prompting consideration of how others could change their behavior to offer the person help or (instrumental) social support, including 'buddy' systems and/or providing social support.             |
| 21. Prompt identification as role model         | Indicating how the person may be an example to others and influence their behavior or provide an opportunity for the person to set a good example.                                                  |
| 22. Prompt self-talk                            | Encourage use of self-instruction and self-encouragement (aloud or silently) to support action.                                                                                                     |
| 23. Relapse prevention                          | Following initial change, help identify situations likely to result in readopting risk behaviors or failure to maintain new behaviors and help the person plan to avoid or manage these situations. |
| 24. Stress management                           | May involve a variety of specific techniques (e.g. progressive relaxation) that do not target the behavior but seek to reduce anxiety and stress.                                                   |
| 25. Motivational interviewing                   | Prompting the person to provide self-motivating statements and evaluations of their own behavior to minimize resistance to change.                                                                  |
| 26. Time management                             | Helping the person make time for the behavior (e.g., to fit it into a daily schedule).                                                                                                              |

## Reference

Abraham C & Michie S. (2008). A taxonomy of behavior change techniques used in interventions. *Health Psychology*; 27(3):379–87
